# Supplementary material
Source: publisher figshare collection journal article supplement (https://diabetesjournals.figshare.com/ndownloader/files/22078662)
Supplement: Supplementary file 1 [file 22078662]

## SUPPLEMENTARY DATA

### **Efficacy and Safety of 1:1 Fixed Ratio Combination of Insulin Glargine/Lixisenatide (iGlarLixi) versus Lixisenatide in Japanese Patients with Type 2 Diabetes Mellitus Inadequately Controlled on Oral Antidiabetic Drugs: The LixiLan JP-O1 Randomized Clinical Trial**

#### **Contents**

|                                                                                             |   |
|---------------------------------------------------------------------------------------------|---|
| List of Investigators .....                                                                 | 2 |
| Supplementary Tables                                                                        |   |
| Supplementary Table 1—iGlarLixi dose titration algorithm .....                              | 3 |
| Supplementary Table 2—Efficacy end points at week 52 .....                                  | 4 |
| Supplementary Table 3—Summary of serious TEAEs .....                                        | 5 |
| Supplementary Figures                                                                       |   |
| Supplementary Fig. 1—Study design. ....                                                     | 6 |
| Supplementary Fig. 2—Patient flowchart: screening, randomization, and discontinuation. .... | 7 |
| Supplementary Fig. 3—Incidence of nausea throughout the study. ....                         | 8 |

## List of Investigators

Hiroaki Seino, Seino Internal Medicine Clinic, Fukushima; Tatsushi Sugiura, Seiwa Clinic, Tokyo; Arihiro Kiyosue, Tokyo-Eki Center-building Clinic, Tokyo; Fuminobu Okuguchi, Okuguchi Clinic, Miyagi; Akifumi Akai, Tokai Memorial Hospital, Aichi; Takashi Kageyama, Tokai Memorial Hospital, Aichi; Toshiyuki Sugiura, Sugiura Clinic, Saitama; Sohei Masunaga, Kaishinkai Masunaga Clinic, Saitama; Hideki Nishimura, Kumanomae Nishimura Internal Clinic, Tokyo; Tsutomu Hayashi, Hayashi Diabetes Clinic, Kanagawa; Yoshihiko Suzuki, HDC Atlas Clinic, Tokyo; Kazuo Kanno, Kanno Naika, Tokyo; Michiko Chosa, Wakamatsu Memorial Hospital, Kagoshima; Yumiko Ide, Tokyo Center Clinic, Tokyo; Akira Matsutani, Shunan City Shinnanyo Hospital, Yamaguchi; Koji Kamada, Shobara Red Cross Hospital, Hiroshima; Ryoya Komatsu, Ryoya Komatsu Clinic, Osaka; Kazuya Murata, Ise Red Cross Hospital, Mie; Hiroshi Takeda, Takeda Clinic, Kanagawa; Takahiko Tokuyama, Tokuyama Clinic, Chiba; Daisuke Suzuki, Suzuki Diabetes Clinic, Kanagawa; Eitaro Nakashima, Chubu-Rosai Hospital, Aichi; Satoshi Inoue, OCROM Clinic, Osaka; Yoshitaka Kajimoto, Medical Corporation Senrichuo Ekimae Clinic, Osaka; Takayuki Hoshina, Hoshina Clinic, Saitama; Seiichi Tanaka, Kyushu Rosai Hospital, Fukuoka; Kiyohide Nunoi, St. Mary's Hospital, Fukuoka; Yuichi Sato, St. Mary's Hospital, Fukuoka; Shuichi Fukuda, Wakakusa Clinic, Tochigi; Masahiro Iwamoto, Medical Corporation Kouseikai Iwamoto Clinic, Kagawa; Tetsuya Enomoto, Enomoto Internal Medicine Clinic, Shizuoka; Mizuki Kaneshiro, Higashirinkan Kaneshiro Diabetes Clinic, Kanagawa; Hiroshi Ohashi, Oyama East Clinic, Tochigi; Hidekatsu Sugimoto, Sugimoto Clinic, Fukuoka; Hideo Takahashi, Eiwakai Minamiakatsuka Clinic, Ibaraki; Naoki Itabashi, Itabashi Diabetic Medicine and Dermatology Clinic, Ibaraki; Yuri Ono, Yuri Ono Clinic, Hokkaido; Noriyuki Kikuchi, Kikuchi Clinic, Shizuoka; Akimitsu Miyauchi, Miyauchi Internal Medicine Clinic, Osaka; Isao Uchimura, Chiyodahoujin Clinic, Tokyo; Shinya Minagawa, Minagawa Clinic, Saitama; Hideaki Ogata, Ogata Medical Clinic, Fukuoka; Toshikatsu Shigihara, Ueno Asakusa Street Clinic, Tokyo; Seiki Wada, Musashi Fujisawa Central Clinic, Saitama; Yoshiki Hata, Minamino Cardiovascular Hospital, Tokyo; Takeshi Ogihara, Juntendo University Hospital, Tokyo; Takashi Majima, Wakasa Clinic, Saitama; Tomio Tsukazaki, Aozora Total Clinic, Saitama; Hideto Ishii, Asano Clinic, Saitama; Takeshi Inazawa, Kashiwa City Hospital, Chiba; Taiji Sekigami, Sekigami Clinic, Kumamoto; Yasuyuki Kihara, Kitakyushu General Hospital, Fukuoka; Ryoji Kozuma, Kitakyushu General Hospital, Fukuoka; Keiichiro Nishino, Murakami Memorial Hospital, Ehime; Akira Kubota, Kubota Clinic of Internal Medicine, Kanagawa; Hiroaki Yagyu, Mito Kyodo General Hospital, Ibaraki; Daisuke Ito, Red Cross Ogawa Hospital, Saitama; Tatsuaki Nakatou, Okayama Saiseikai General Hospital Outpatient Center, Okayama; Yoko Hirasawa, Medical Corporation Plumeria Plumeria Clinic, Shizuoka; Ikuro Matsuba, Matsuba Clinic, Kanagawa; Jiichi Anzai, Anzai Clinic, Hokkaido; Takayuki Ogiwara, Gunmaken Saiseikai Maebashi Hospital, Gunma; Tsuyoshi Tao, Tao Internal Medicine Clinic, Yamaguchi; Makoto Kunisaki, Kunisaki Makoto Clinic, Fukuoka.

**Supplementary Table 1—iGlarLixi dose titration algorithm**

| Median of fasting SMPG from the last 3 measurements (mmol/L)                                                                                                 | Dose titration of iGlarLixi (dose steps [units/μg]/day)                             |
|--------------------------------------------------------------------------------------------------------------------------------------------------------------|-------------------------------------------------------------------------------------|
| >7.8                                                                                                                                                         | +2                                                                                  |
| >5.6 and ≤7.8                                                                                                                                                | +1                                                                                  |
| <b>Glycemic target:</b> ≥4.4 and ≤5.6                                                                                                                        | No change                                                                           |
| ≥3.3 and <4.4                                                                                                                                                | -2                                                                                  |
| <3.3 or occurrence of 2 (or more) symptomatic hypoglycemic episodes or 1 severe hypoglycemic episode (requiring assistance) documented in the preceding week | -3 or more or at the discretion of the investigator or medically qualified designee |

iGlarLixi, insulin glargine/lixisenatide fixed ratio combination; SMPG, self-monitored plasma glucose.

**Supplementary Table 2—Efficacy end points at week 52**

| Parameter                                        | iGlarLixi<br>(n = 161)      | Lixi<br>(n = 160)          |
|--------------------------------------------------|-----------------------------|----------------------------|
| HbA <sub>1c</sub> , % [mmol/mol]                 |                             |                            |
| Baseline                                         | 8.39 ± 0.64 [68 ± 7.0]      | 8.38 ± 0.63 [68 ± 6.9]     |
| Week 52                                          | 6.86 ± 0.80 [51 ± 8.7]      | 8.02 ± 1.05 [64 ± 11.5]    |
| Change from baseline                             | -1.53 ± 0.92 [-16.7 ± 10.1] | -0.36 ± 1.11 [-3.9 ± 12.1] |
| HbA <sub>1c</sub> <7% [53 mmol/mol], n (%)       |                             |                            |
| Week 52                                          | 99 (61.5)                   | 25 (15.6)                  |
| HbA <sub>1c</sub> ≤6.5% [48 mmol/mol], n (%)     |                             |                            |
| Week 52                                          | 66 (41.0)                   | 7 (4.4)                    |
| FPG, mmol/L                                      |                             |                            |
| Baseline                                         | 9.83 ± 1.61                 | 9.62 ± 1.71                |
| Week 52                                          | 7.53 ± 1.75                 | 9.71 ± 2.24                |
| Change from baseline                             | -2.30 ± 1.76                | 0.07 ± 2.29                |
| Average 7-point SMPG, mmol/L                     |                             |                            |
| Baseline                                         | 11.39 ± 1.98                | 11.26 ± 2.00               |
| Week 52                                          | 8.43 ± 1.74                 | 10.65 ± 2.56               |
| Change from baseline                             | -2.96 ± 2.31                | -0.55 ± 2.62               |
| Body weight, kg                                  |                             |                            |
| Baseline                                         | 72.26 ± 14.80               | 72.95 ± 14.87              |
| Week 52                                          | 73.26 ± 14.96               | 71.46 ± 15.02              |
| Change from baseline                             | 1.00 ± 2.97                 | -1.53 ± 2.32               |
| HbA <sub>1c</sub> <7% with no weight gain, n (%) |                             |                            |
| Week 52                                          | 47 (29.2)                   | 24 (15.0)                  |
| Daily iGlar dose*, units                         |                             |                            |
| Day 1                                            | 5.00 ± 0.00                 |                            |
| Week 52                                          | 17.01 ± 4.04                |                            |
| Change from day 1                                | 12.01 ± 4.04                |                            |
| Patients requiring rescue therapy, n (%)         |                             |                            |
| Week 52                                          | 3 (1.9)                     | 37 (23.1)                  |

Data are shown as mean ± SD unless otherwise indicated. Includes only patients for whom both baseline and week 52 (LOCF) measurements are available for continuous end points. Patients were treated as non-responders if they had no assessments at week 52 (LOCF) for categorical end points. Analysis included measurements obtained before the introduction of rescue medication and up to 14 days for HbA<sub>1c</sub>, 1 day for FPG, 0 day for average 7-point SMPG and iGlar dose, and 3 days for body weight after the last injection of open-label study drug. Number of patients analyzed at week 52: n (iGlarLixi) = 161 and n (Lixi) = 157 for FPG; n (iGlarLixi) = 160 and n (Lixi) = 148 for average 7-point SMPG; n (iGlarLixi) = 161 and n (Lixi) = 157 for body weight. iGlarLixi, insulin glargine/lixisenatide fixed ratio combination; Lixi, lixisenatide; FPG, fasting plasma glucose; SMPG, self-monitored plasma glucose; iGlar, insulin glargine; SD, standard deviation; LOCF, last observation carried forward.

\*Dose of first injection of open-label study drug was considered as average daily insulin dose at day 1. Since iGlarLixi contains a 1:1 fixed ratio combination of iGlar (units) and Lixi (µg), results in iGlarLixi group are considered as results of Lixi dose (µg).

**Supplementary Table 3—Summary of serious TEAEs**

| Serious TEAE by organ class and PT*, n (%)                              | iGlarLixi<br>(n = 161) |         | Lixi<br>(n = 160) |          |
|-------------------------------------------------------------------------|------------------------|---------|-------------------|----------|
|                                                                         | Week 26                | Week 52 | Week 26           | Week 52  |
| Any serious TEAE                                                        | 5 (3.1)                | 7 (4.3) | 4 (2.5)           | 13 (8.1) |
| Infections and infestations                                             | 0                      | 0       | 0                 | 4 (2.5)  |
| Appendicitis                                                            | 0                      | 0       | 0                 | 1 (0.6)  |
| Liver abscess                                                           | 0                      | 0       | 0                 | 1 (0.6)  |
| Pneumonia                                                               | 0                      | 0       | 0                 | 1 (0.6)  |
| Pyelonephritis                                                          | 0                      | 0       | 0                 | 1 (0.6)  |
| Neoplasms benign, malignant and unspecified<br>(incl. cysts and polyps) | 2 (1.2)                | 2 (1.2) | 0                 | 0        |
| Benign neoplasm of skin                                                 | 1 (0.6)                | 1 (0.6) | 0                 | 0        |
| Tongue neoplasm malignant stage unspecified                             | 1 (0.6)                | 1 (0.6) | 0                 | 0        |
| Metabolism and nutrition disorders                                      | 0                      | 0       | 1 (0.6)           | 1 (0.6)  |
| Diabetes mellitus inadequate control                                    | 0                      | 0       | 1 (0.6)           | 1 (0.6)  |
| Cardiac disorders                                                       | 1 (0.6)                | 1 (0.6) | 1 (0.6)           | 3 (1.9)  |
| Myocardial ischaemia                                                    | 1 (0.6)                | 1 (0.6) | 0                 | 0        |
| Angina pectoris                                                         | 0                      | 0       | 0                 | 1 (0.6)  |
| Cardiac failure congestive                                              | 0                      | 0       | 1 (0.6)           | 1 (0.6)  |
| Coronary artery stenosis                                                | 0                      | 0       | 0                 | 1 (0.6)  |
| Respiratory, thoracic and mediastinal disorders                         | 0                      | 0       | 1 (0.6)           | 1 (0.6)  |
| Pulmonary alveolar haemorrhage                                          | 0                      | 0       | 1 (0.6)           | 1 (0.6)  |
| Gastrointestinal disorders                                              | 0                      | 0       | 1 (0.6)           | 1 (0.6)  |
| Pancreatitis acute                                                      | 0                      | 0       | 1 (0.6)           | 1 (0.6)  |
| Hepatobiliary disorders                                                 | 1 (0.6)                | 1 (0.6) | 0                 | 1 (0.6)  |
| Bile duct stone                                                         | 1 (0.6)                | 1 (0.6) | 0                 | 0        |
| Jaundice cholestatic                                                    | 0                      | 0       | 0                 | 1 (0.6)  |
| Skin and subcutaneous tissue disorders                                  | 1 (0.6)                | 1 (0.6) | 0                 | 0        |
| Skin ulcer                                                              | 1 (0.6)                | 1 (0.6) | 0                 | 0        |
| Musculoskeletal and connective tissues disorders                        | 0                      | 1 (0.6) | 0                 | 1 (0.6)  |
| Osteoarthritis                                                          | 0                      | 1 (0.6) | 0                 | 1 (0.6)  |
| Congenital, familial and genetic disorders                              | 1 (0.6)                | 1 (0.6) | 0                 | 0        |
| Atrial septal defect                                                    | 1 (0.6)                | 1 (0.6) | 0                 | 0        |
| Injury, poisoning and procedural complications                          | 0                      | 1 (0.6) | 1 (0.6)           | 3 (1.9)  |
| Fractured ischium                                                       | 0                      | 1 (0.6) | 0                 | 0        |
| Cardiac contusion                                                       | 0                      | 0       | 1 (0.6)           | 1 (0.6)  |
| Femoral neck fracture                                                   | 0                      | 0       | 0                 | 1 (0.6)  |
| Humerus fracture                                                        | 0                      | 0       | 0                 | 1 (0.6)  |
| Sternal fracture                                                        | 0                      | 0       | 1 (0.6)           | 1 (0.6)  |

Table shows time from first injection of open-label study drug up to 3 days after the last injection of open-label study drug regardless of introduction of rescue therapy. For 26-week treatment period, last injection of open-label study drug was at or before week 26 visit (or day 183 if week 26 visit was missing). iGlarLixi, insulin glargine/lixisenatide fixed ratio combination; Lixi, lixisenatide; TEAE, treatment-emergent adverse event; PT, preferred term.

\* Based on Medical Dictionary for Regulatory Activities Version 20.1.

## Supplementary Fig. 1—Study design.

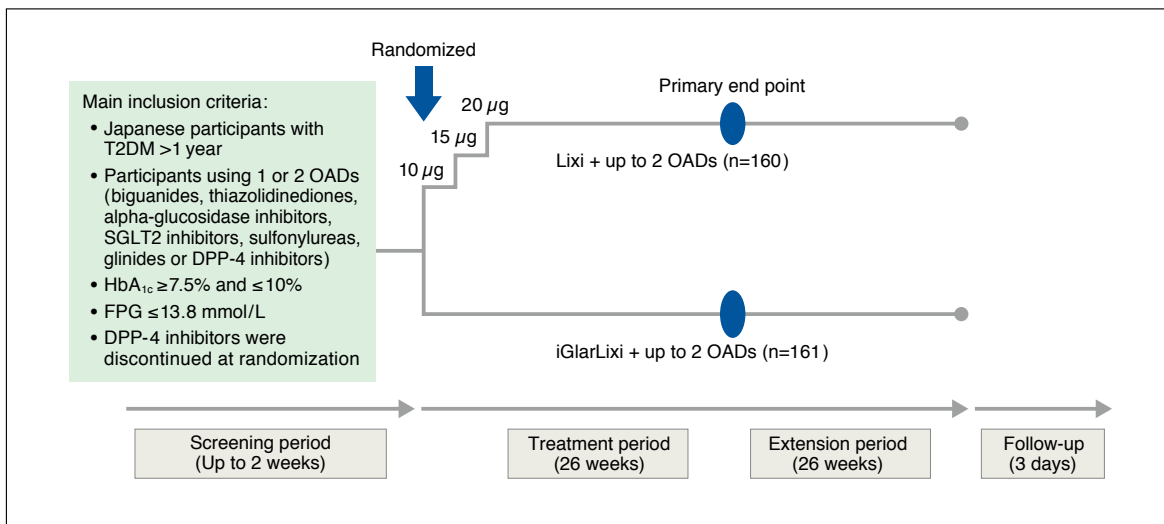

T2DM, type 2 diabetes mellitus; OAD, oral antidiabetic drug; SGLT2, sodium glucose cotransporter-2; DPP-4, dipeptidyl peptidase 4; FPG, fasting plasma glucose; Lixi, lixisenatide; iGlarLixi, insulin glargine/lixisenatide fixed ratio combination.

**Supplementary Fig. 2—Patient flowchart: screening, randomization, and discontinuation.**

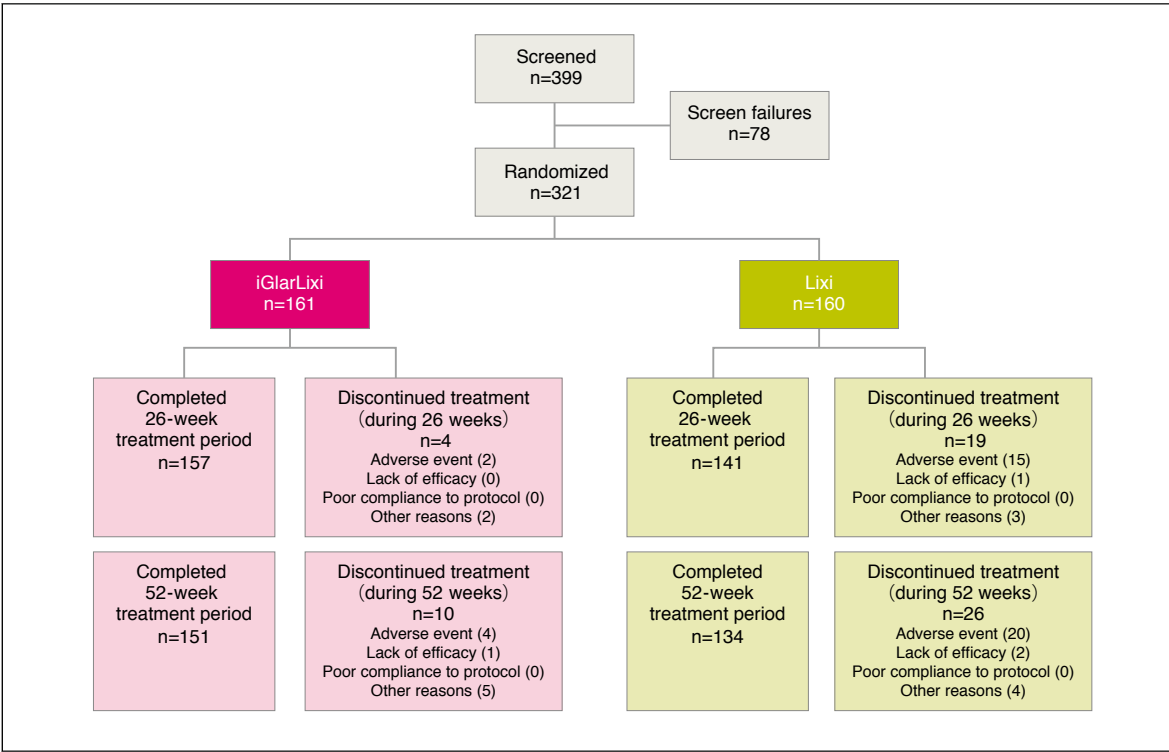

iGlarLixi, insulin glargine/lixisenatide fixed ratio combination; Lixi, lixisenatide.

Supplementary Fig. 3—Incidence of nausea throughout the study.

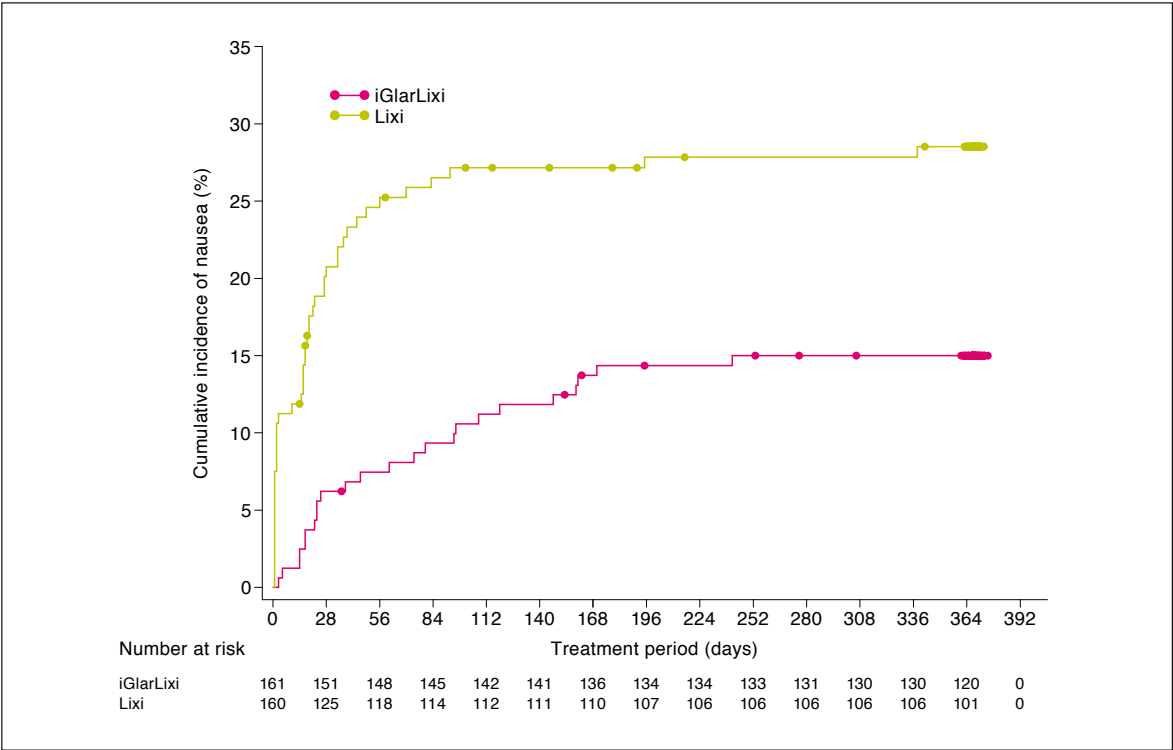

The 52-week treatment period is defined as the time from the first injection of open-label study drug up to 3 days after the last injection of open-label study drug regardless of the introduction of rescue therapy. iGlarLixi, insulin glargine/lixisenatide fixed ratio combination; Lixi, lixisenatide.
